# Supplementary material
Source: publisher figshare collection journal article supplement (https://acs.figshare.com/ndownloader/files/9365131)
Supplement: Supplementary file 1 [file 9365131]

## Supporting information

### **Self-organization ability of chiral $N^\alpha$ -substituted, $N^\beta$ -Boc protected $\alpha$ -hydrazinoacetamides in the crystal and solution states.**

Ralph-Olivier Moussodia, Eugénie Romero, Emmanuel Wenger, Brigitte Jamart-Grégoire,\* and Samir Acherar\*

Corresponding author's names and complete contact information:

Dr Samir Acherar and Pr Brigitte Jamart-Grégoire

LCPM, Université de Lorraine-CNRS, UMR 7375

1 rue Grandville, BP 20451, 54001 Nancy Cedex, France

E-mails: Samir.Acherar@univ-lorraine.fr and Brigitte.Jamart@univ-lorraine.fr

Phone numbers: +33 (0)3 72743687 and +33 (0)3 72743901

Fax: +33 (0)3 83 37 99 77

## Table of contents

|                                                                                        |            |
|----------------------------------------------------------------------------------------|------------|
| <b><sup>1</sup>H NMR (300 MHz) spectrum of 1 (CDCl<sub>3</sub>/10 mM, 298K)</b>        | <b>S2</b>  |
| <b><i>J</i> mod <sup>13</sup>C NMR (75 MHz) spectrum of 1 (CDCl<sub>3</sub>, 298K)</b> | <b>S2</b>  |
| <b>2D NOESY NMR(300 MHz) spectrum of 1 (CDCl<sub>3</sub>/10 mM, 298K)</b>              | <b>S3</b>  |
| <b><sup>1</sup>H NMR (300 MHz) spectrum of 2 (CDCl<sub>3</sub>/10 mM, 298K)</b>        | <b>S4</b>  |
| <b><i>J</i> mod <sup>13</sup>C NMR (75 MHz) spectrum of 2 (CDCl<sub>3</sub>, 298K)</b> | <b>S4</b>  |
| <b>2D NOESY NMR(300 MHz) spectrum of 2 (CDCl<sub>3</sub>/10 mM, 298K)</b>              | <b>S5</b>  |
| <b><sup>1</sup>H NMR (300 MHz) spectrum of 3 (CDCl<sub>3</sub>/10 mM, 298K)</b>        | <b>S6</b>  |
| <b><i>J</i> mod <sup>13</sup>C NMR (75 MHz) spectrum of 3 (CDCl<sub>3</sub>, 298K)</b> | <b>S6</b>  |
| <b>2D NOESY NMR(300 MHz) spectrum of 3 (CDCl<sub>3</sub>/10 mM, 298K)</b>              | <b>S7</b>  |
| <b>General information for X-ray diffraction data</b>                                  | <b>S8</b>  |
| <b>ORTEP view of 1</b>                                                                 | <b>S10</b> |
| <b>ORTEP view of 2</b>                                                                 | <b>S11</b> |
| <b>ORTEP view of 3</b>                                                                 | <b>S12</b> |

**<sup>1</sup>H NMR (300 MHz) spectrum of 1 (CDCl<sub>3</sub>/10 mM, 298K)**

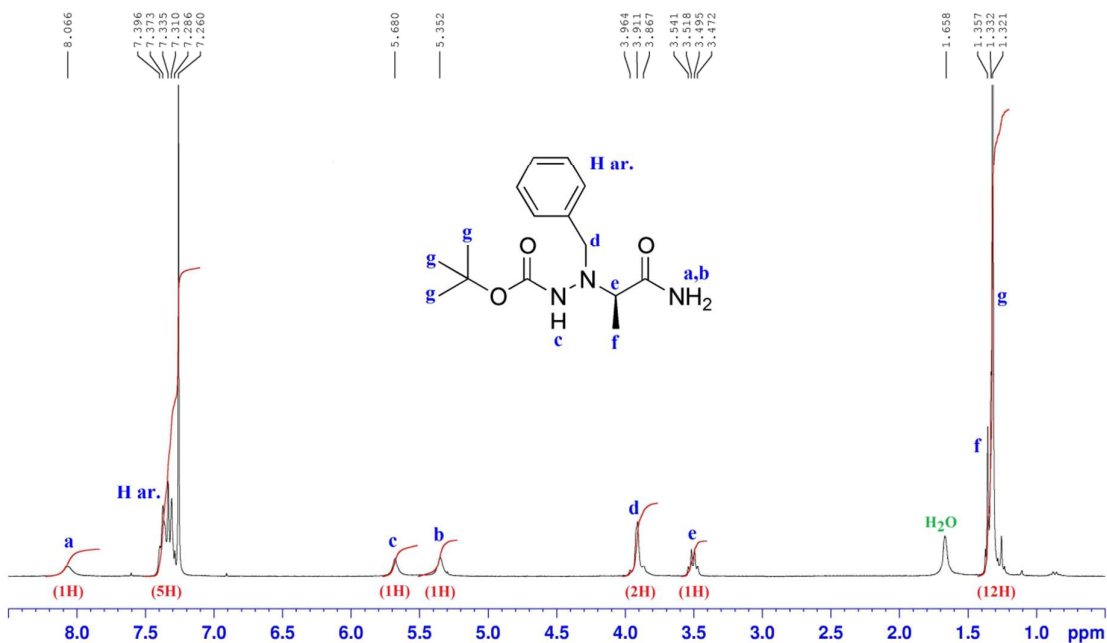

**$J$  mod<sup>13</sup>C NMR (75 MHz) spectrum of 1 (CDCl<sub>3</sub>, 298K)(C and CH<sub>2</sub> up; CH<sub>3</sub> and CH down)**

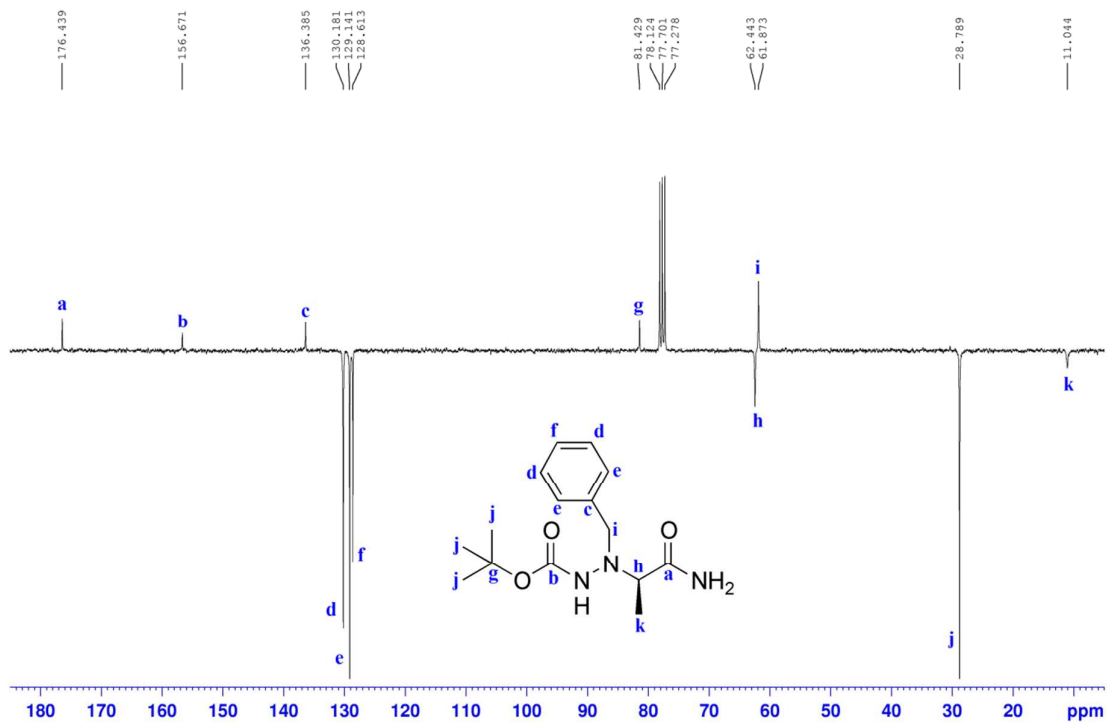

(**d** and **e** are interchangeable carbon chemical shift assignments)

2D NOESY NMR (300 MHz) spectrum of **1** (CDCl<sub>3</sub>/10 mM, 298K)

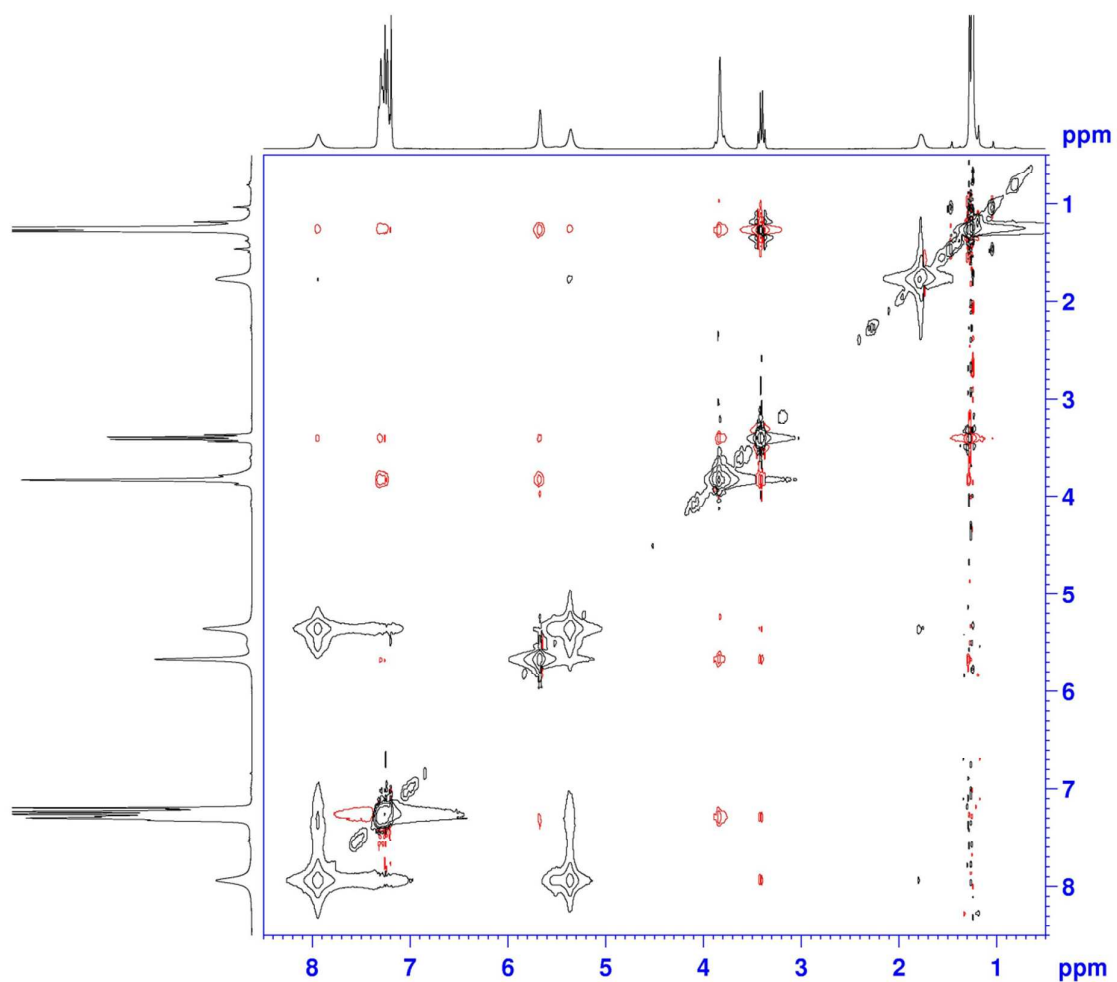

**$^1\text{H}$  NMR (300 MHz) spectrum of 2 ( $\text{CDCl}_3$ /10 mM, 298K)**

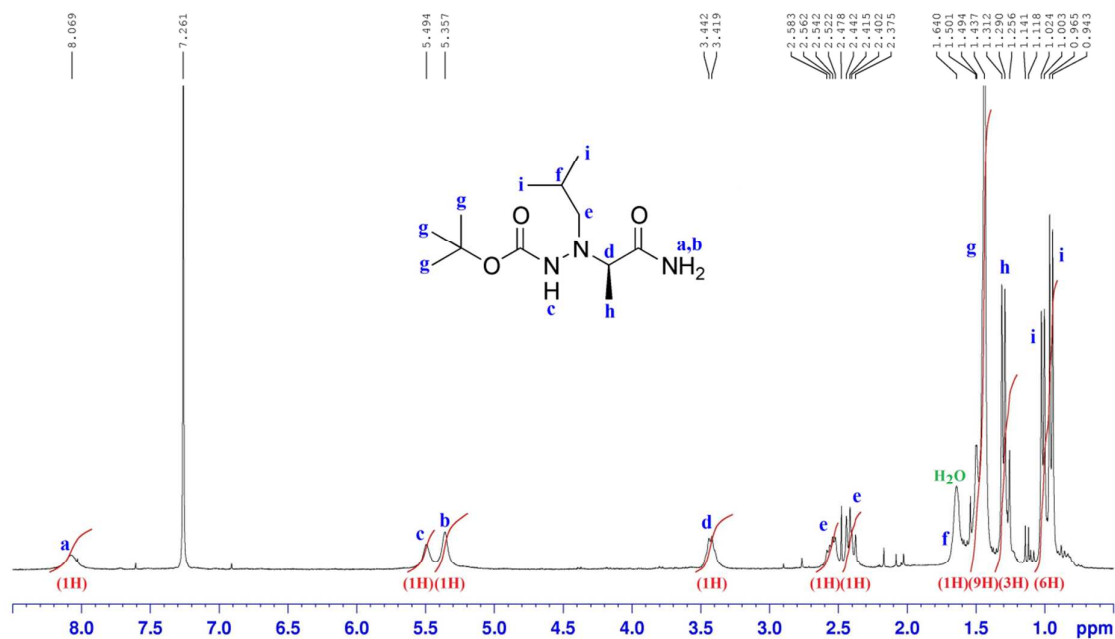

**$J$  mod  $^{13}\text{C}$  NMR (75 MHz) spectrum of 2 ( $\text{CDCl}_3$ , 298K) (C and CH<sub>2</sub> up; CH<sub>3</sub> and CH down)**

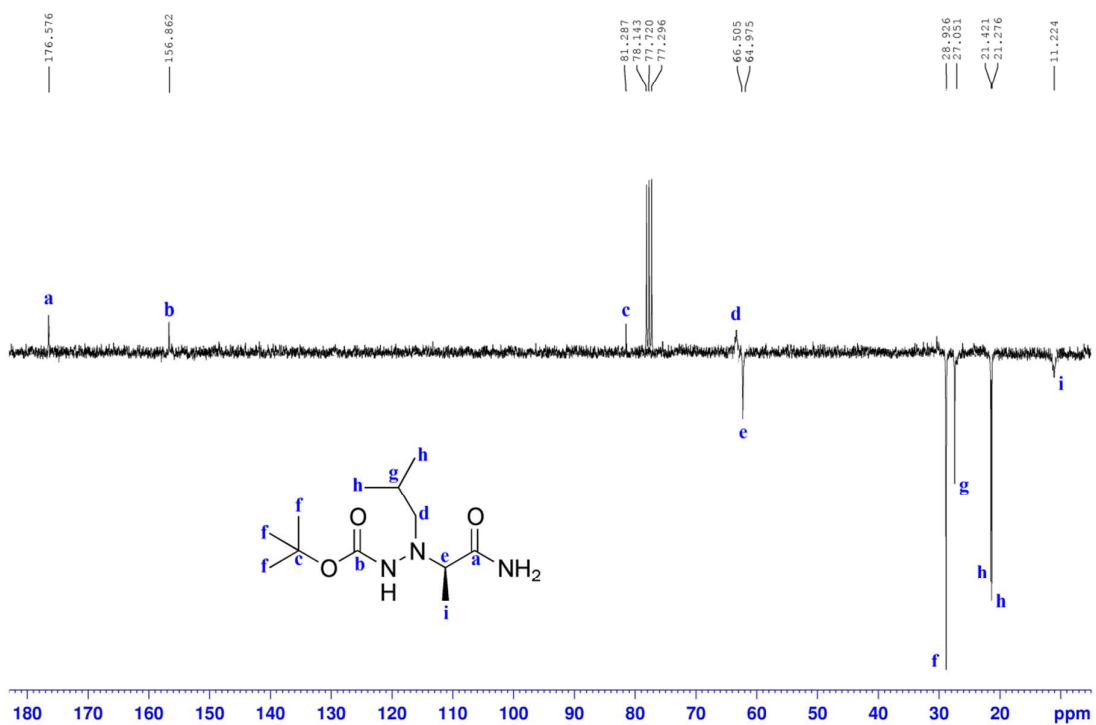

2D NOESY NMR (300 MHz) spectrum of **2** (CDCl<sub>3</sub>/10 mM, 298K)

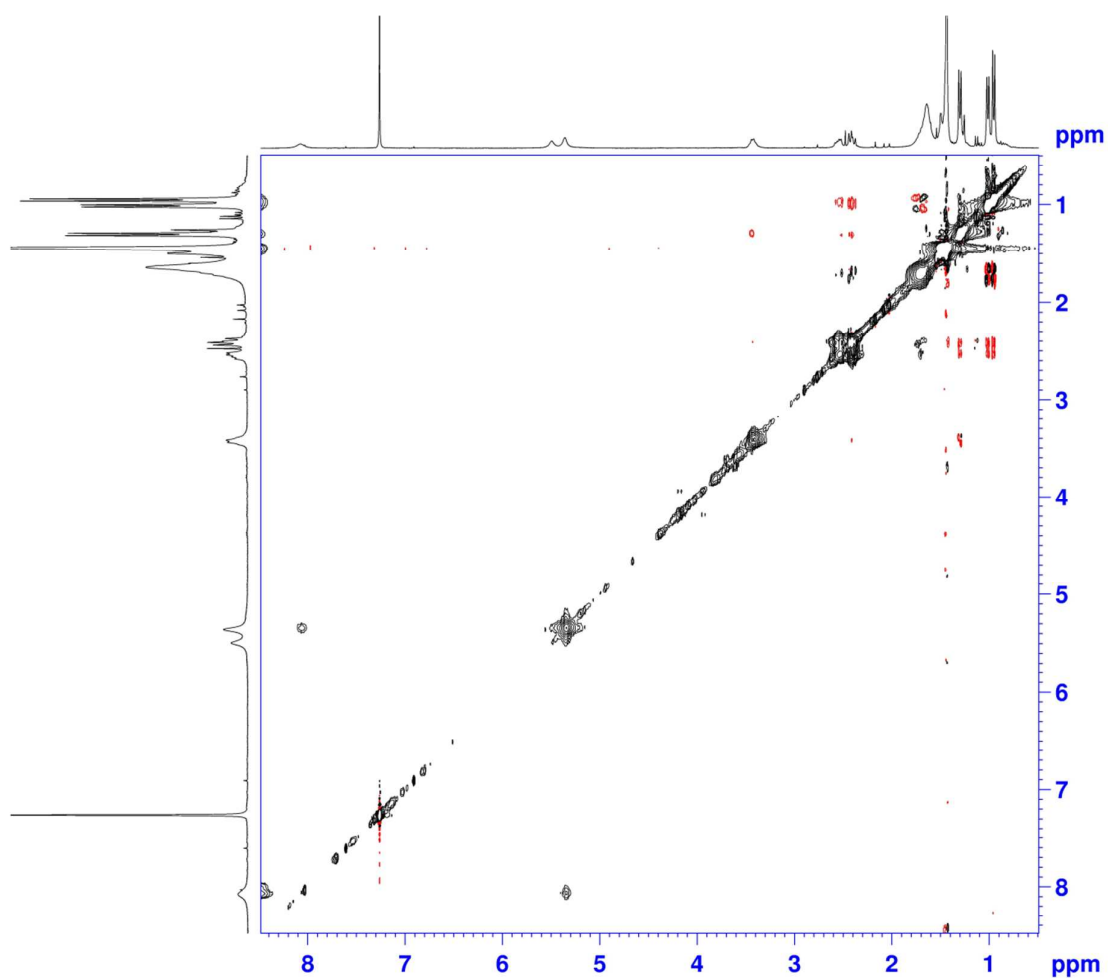

**$^1\text{H}$  NMR (300 MHz) spectrum of 3 ( $\text{CDCl}_3/10\text{ mM}$ , 298K)**

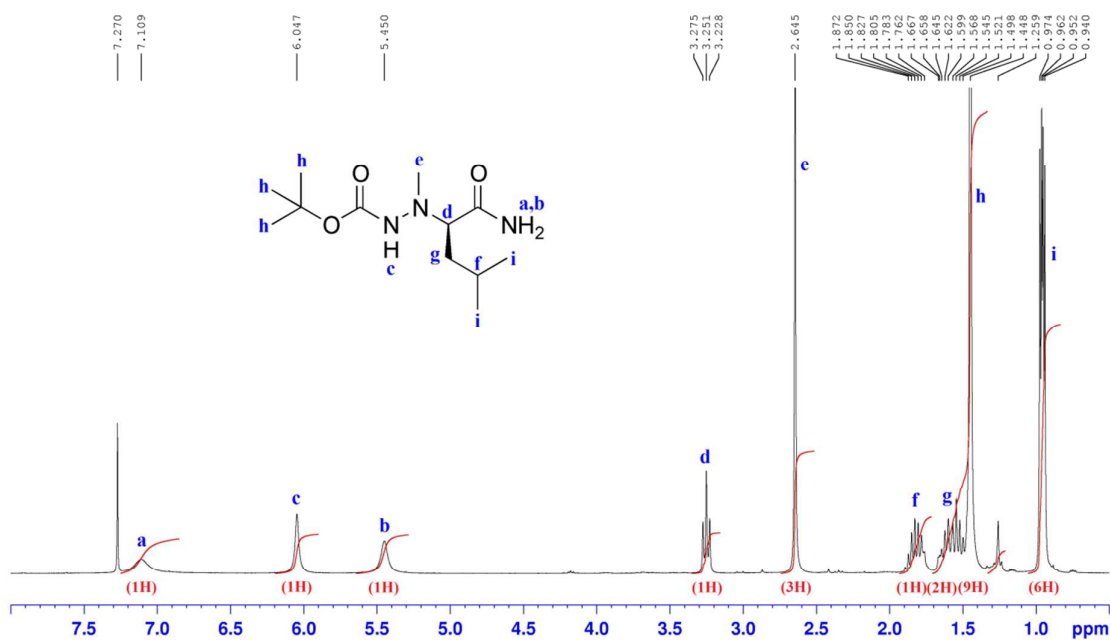

**$J$  mod  $^{13}\text{C}$  NMR (75 MHz) spectrum of 3 ( $\text{CDCl}_3$ , 298K)(C and  $\text{CH}_2$  up;  $\text{CH}_3$  and CH down)**

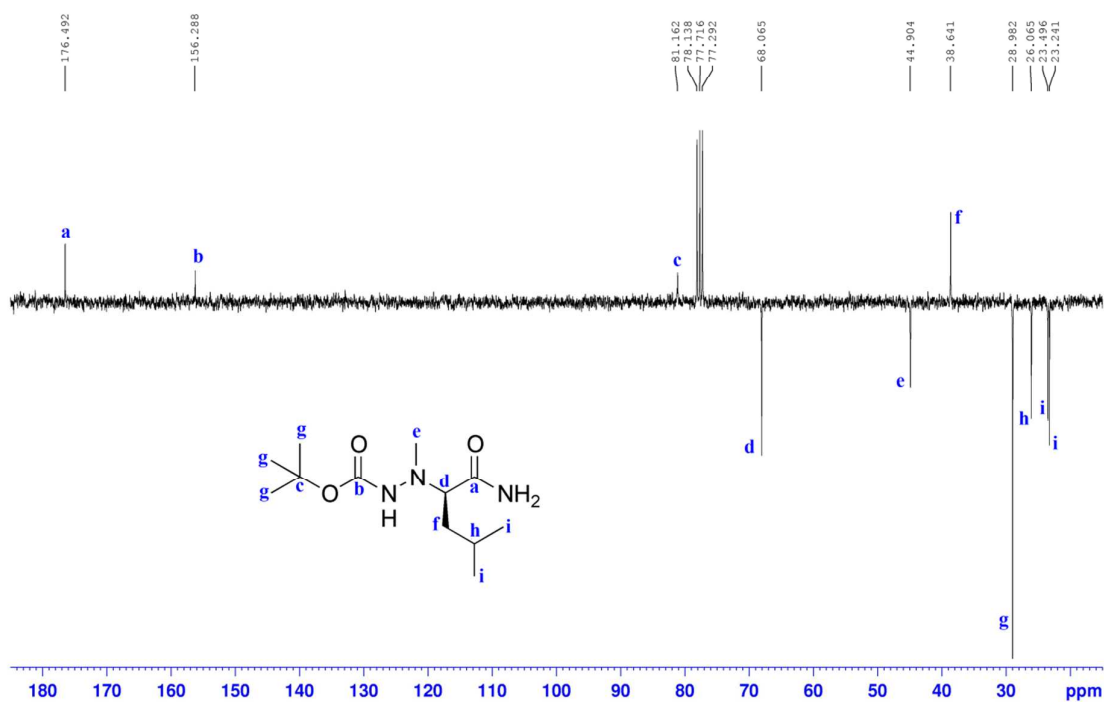

2D NOESY NMR (300 MHz) spectrum of **3** (CDCl<sub>3</sub>/10 mM, 298K)

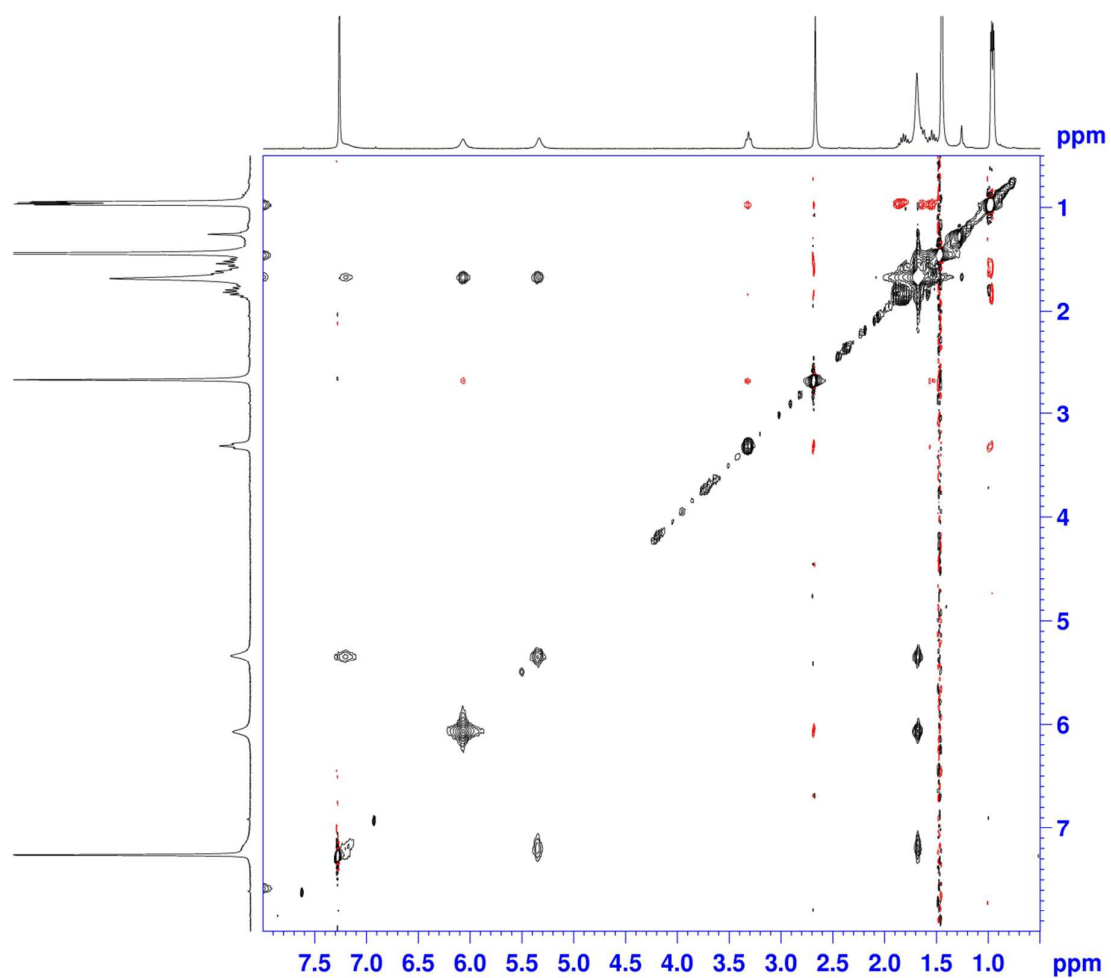

### General information for X-ray diffraction data

- ✓ X-ray data from single crystals of compounds **1** and **3** were collected at 110K with a Rigaku Oxford Diffraction SuperNovadifractometer equipped with a copper microfocus source ( $\lambda = 1.54184 \text{ \AA}$ ) and an Atlas CCD detector. Diffraction data were processed using CrysAlis PRO (Rigaku Oxford Diffraction, 2014).
- ✓ X-ray data from a single crystal of compound **2** were collected at 100 K with a D8 Venture Bruker-AXS diffractometer equipped with a molybdenum microfocus source ( $\lambda = 0.71073 \text{ \AA}$ ) with a PHOTON100 detector.
- ✓ Diffraction data were processed with the Bruker“SAINT”software package.
- ✓ The three structures were solved by direct methods with SIR2014 (M. C. Burla, R. Caliendo, B. Carrozzini, G. L. Casciarano, C. Cuocci, C. Giacovazzo, M. Mallamo, A. Mazzone, G. Polidori *J. Appl. Cryst.* **2015**, *48*, 306-309).
- ✓ The structures models refinements were conducted using a spherical atom model with ShelXle (C. B. Hübschle, G. M. Sheldrick, B. Dittrich *J. Appl. Cryst.* **2011**, *44*, 1281-1284).
- ✓ All X-ray diffraction data for each compound (**1-3**) are deposited in CCDC database under accession numbers: 1484989, 1484990 and 1484991 respectively.

### Crystallographic parameters of 1-3

Compound **1-3** were recrystallized from a mixture petroleum ether/dichloromethane, by slow evaporation.

#### ✓ Crystal structure determination of compound 1:

$C_{15}H_{23}N_3O_3$ ,  $M = 293.36$ , orthorhombic,  $a = 5.14336(16)$ ,  $b = 16.7956(5)$ ,  $c = 18.7002(6)$  Å,  $U = 1615.43(9)$  Å<sup>3</sup>,  $T = 110$  K, space group  $P2_12_12_1$  (no.19),  $Z = 4$ , 13322 reflections measured, 3385 unique ( $R_{int} = 0.0473$ ), which were used in all calculations. The final  $wR(F^2)$  was 0.0905 (all data)

#### ✓ Crystal structure determination of compound 2:

$C_{24}H_{50}N_6O_6$ ,  $M = 518.70$ , monoclinic,  $a = 10.5287(4)$ ,  $b = 9.9246(4)$ ,  $c = 14.8794(6)$  Å<sup>3</sup> = 104.141(2) °,  $U = 1507.68(10)$  Å<sup>3</sup>,  $T = 100$  K, space group  $P2_1$  (no.4),  $Z = 2$ , 25270 reflections measured, 5125 unique ( $R_{int} = 0.0450$ ), which were used in all calculations. The final  $wR(F^2)$  was 0.0869 (all data).

#### ✓ Crystal structure determination of compound 3:

$C_{12}H_{25}N_3O_3$ ,  $M = 259.35$ , orthorhombic,  $a = 9.787(5)$ ,  $b = 12.007(5)$ ,  $c = 27.226(5)$  Å,  $U = 3199(2)$  Å<sup>3</sup>,  $T = 100$  K, space group  $P2_12_12_1$  (no.19),  $Z = 8$ , 33994 reflections measured, 6686 unique ( $R_{int} = 0.0232$ ), which were used in all calculations. The final  $wR(F^2)$  was 0.0986 (all data).

**ORTEP view of the unique molecule in the asymmetric unit of 1**

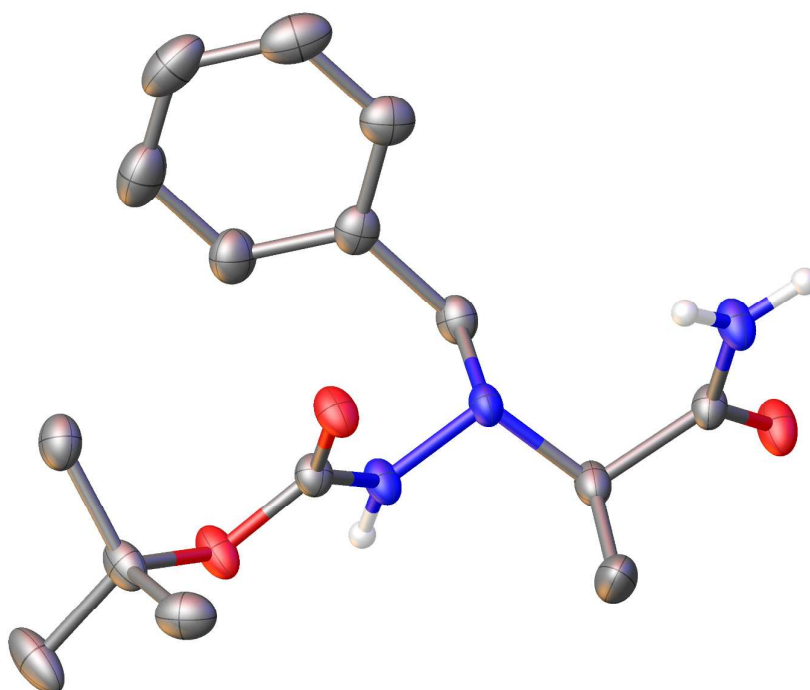

**Displacement spheres are drawn at the 50% probability level**  
**Hydrogen atoms except NHs are omitted for clarity**

ORTEP view of the two molecules (A and B) in the asymmetric unit of 2

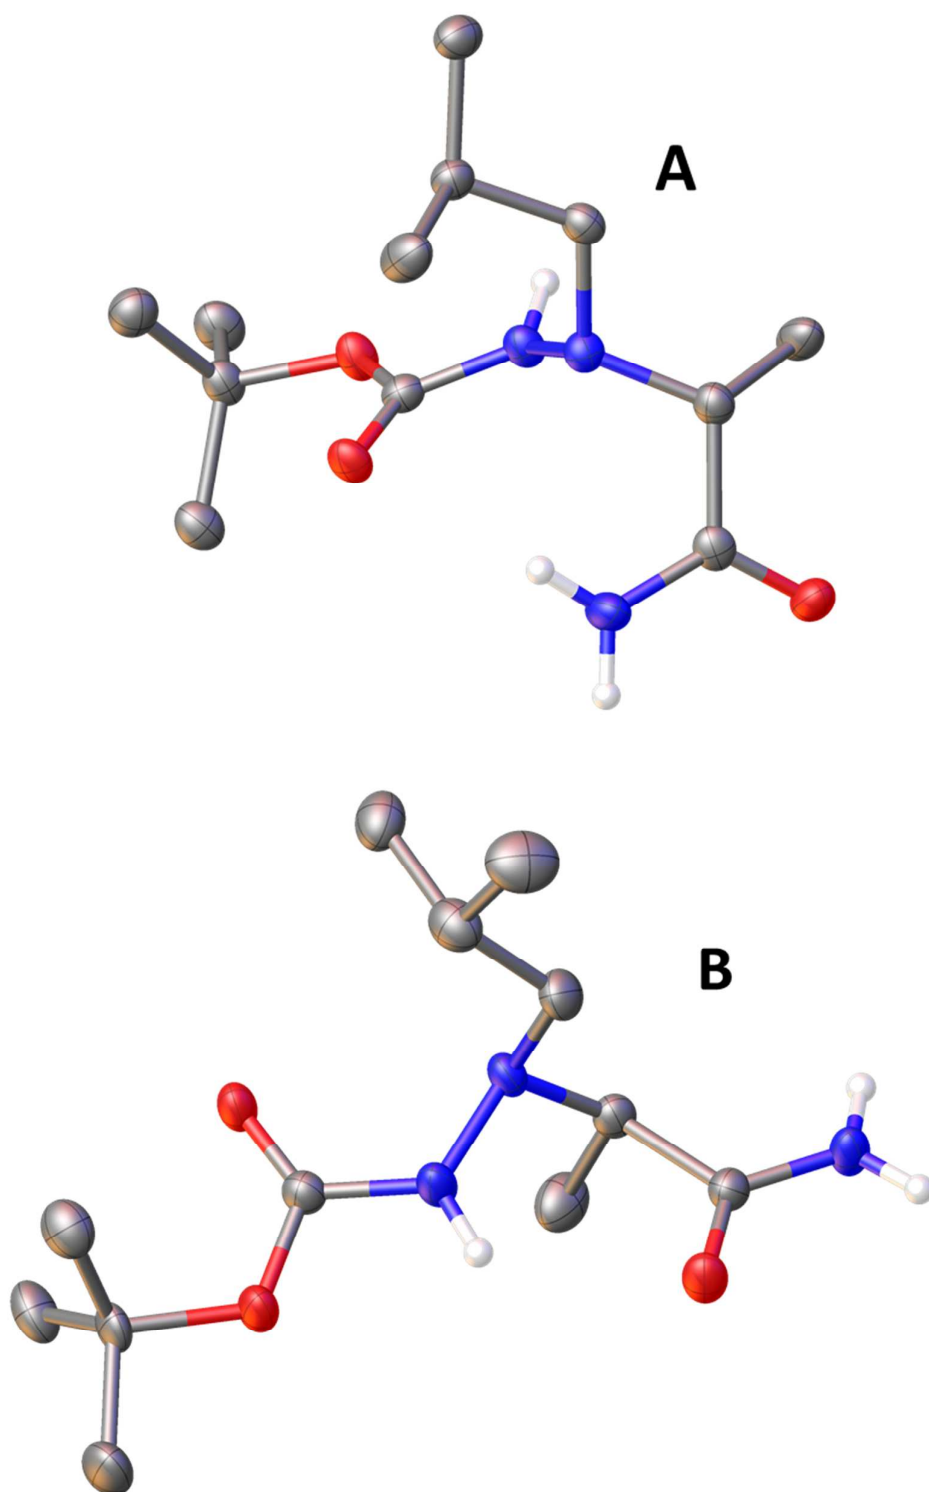

**A (hydrazinoturn conformation) and B (C<sub>6</sub> conformation)**  
**Displacement spheres are drawn at the 50% probability level.**  
**Hydrogen atoms except NHs are omitted for clarity**

**ORTEP view of the twomolecules(A and B) in the asymmetric unit of 3**

- ✓ Molecule A is ordered (100% occupancy)
- ✓ Molecule B is slightly disordered (occupancy ratios of 0.66:0.33)

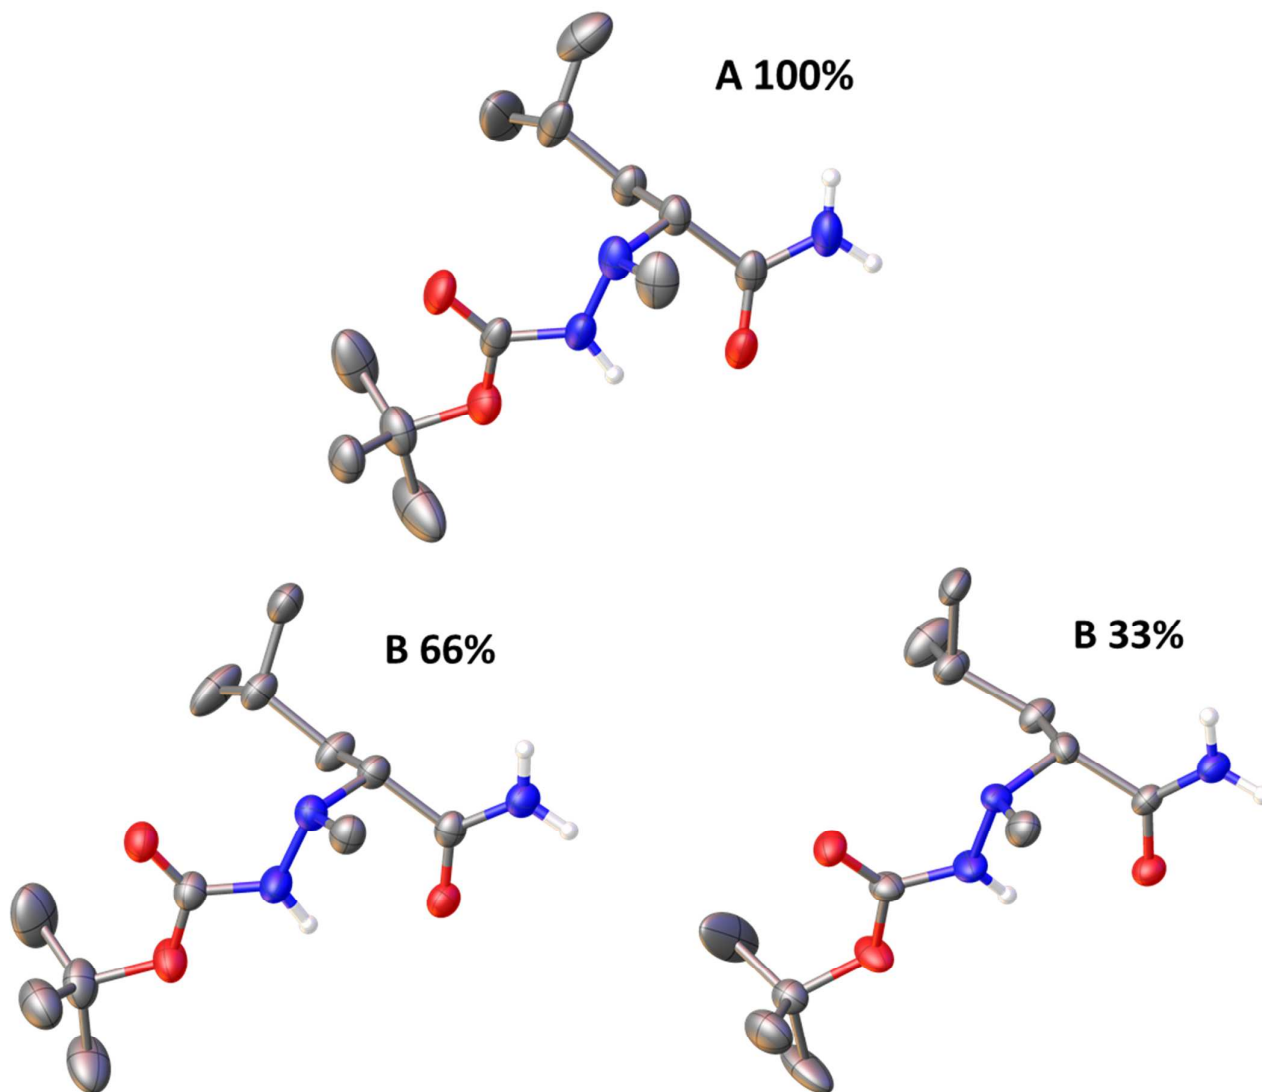

**A and B ( $C_6$  conformations)**  
**Displacement spheres are drawn at the 50% probability level.**  
**Hydrogen atoms except NHs are omitted for clarity**
